# **Invasion history of *Harmonia axyridis* (Pallas, 1773) (Coleoptera: Coccinellidae) in Ecuador**

Diego F. Cisneros-Heredia, Emilia Peñaherrera-Romero

Universidad San Francisco de Quito USFQ, Colegio de Ciencias Biológicas y Ambientales

COCIBA, Quito 170901, Ecuador

Universidad San Francisco de Quito USFQ, Instituto de Diversidad Biológica Tropical

iBIOTROP, Museo de Zoología & Laboratorio de Zoología Terrestre, Quito, Ecuador

Corresponding author:

Diego F. Cisneros-Heredia. E-mail address: [diego.cisnerosheredia@gmail.com](mailto:diego.cisnerosheredia@gmail.com)

## Abstract

*Harmonia axyridis* is a ladybird extensively used around the world for biological control of agricultural pest. However, it has become invasive in several countries, producing negative ecological and socio-economic impacts. Herein, we review the invasion history of the Harlequin Ladybird *Harmonia axyridis* (Pallas, 1773) in Ecuador. Although first reported in Ecuador in 2012, museum specimens date back to 2004 and it is currently established across the country, especially along the Andean region. Due to its invasive nature, further studies are urgently needed to evaluate possible impacts of *H. axyridis* on the Ecuadorian biodiversity and agroindustry.

**Key words:** Andes; Coccinellinae; distribution; elevation; introduced species; ladybird; natural history; new records; range extension.

## INTRODUCTION

Numerous species have arrived at regions they would have never reached on their own thanks to human-mediated processes (Ricciardi, 2007; Boivin et al., 2016). Although many non-native species are unable to thrive in new environments, some are successful and become invasive by establishing fast-growing, spreading populations. Invasive species have been described as major drivers of current biodiversity changes due to their contribution to biota homogenization, alteration of biological communities and ecosystem functions, and socio-economic impacts on humans (Chapin III et al., 2000; Daszak et al., 2000; Crooks, 2002; O'Dowd et al., 2003; Clavero & García-Berthou, 2005; Mace et al., 2005; Doody et al., 2009; Pejchar & Mooney, 2009; Ricciardi et al., 2013; Simberloff et al., 2013; Bellard et al., 2016; Doherty et al., 2016; Cisneros-Heredia, 2018).

*Harmonia axyridis* (Pallas, 1773), commonly referred to as the Harlequin Ladybird or Asian Multicolored Ladybeetle, is a member of the family Coccinellidae native to East Asia (Orlova-Bienkowskaja, Ukrainsky & Brown, 2015). It has been deliberately translocated as a control agent in America, Europe and Africa since the beginning of the 20<sup>th</sup> century, establishing naturalized and expanding populations in the three continents, becoming invasive (Lombaert et al., 2010; Brown et al., 2011). It is a successful invader due to its wide dietary range, ability to

establish and disperse, and robustness and flexibility of its immune system (Roy, Brown & Majerus, 2006; Vilcinskas, Mukherjee & Vogel, 2013). *Harmonia axyridis* is considered as the most invasive ladybird on Earth (Roy, Brown & Majerus, 2006).

*Harmonia axyridis* is a voracious predator of agricultural pests, consuming soft-bodied Sternorrhyncha hemipterans as essential preys, i.e. aphids, coccids, psyllids, and adelgids (Roy, Brown & Majerus, 2006). However, *H. axyridis* has a wider dietary range and is an interguild and intraguild polyphagous predator, being able to consume immature stages of coccinellids and other coleopterans, lepidopterans, neuropterans, dipterans, tetranychid mites, and plant material such as fruits, pollen, nectar, leaves, and seeds (Koch 2003; Koch et al., 2004; Berkvens et al. 2008; Koch & Galvan, 2008; Moser, Harwood & Obrycki, 2008; Roy & Wajnberg, 2008; Martins et al., 2009; Lucas, 2012; Michaud, 2012). In general, *H. axyridis* is considered one of the top predators in aphidophagous and coccidophagous guilds, largely free from predation pressure, and regulated more by bottom-up than top-down forces (Lucas, 2012). *Harmonia axyridis* seems to dominate confrontations with other coccinellid species, exerting strong intraguild predation pressure (Pell et al., 2008; Ware & Majerus 2008; Lucas, 2012; Katsanis et al. 2013). Due to its polyphagy and guild interactions, non-native populations of *H. axyridis* have adverse effects on native biodiversity and agroindustry by attacking non-target arthropods, modifying the structure and dynamics of invertebrate assemblages, replacing or marginalising native coccinellids by competition and predation, and feeding on commercial fruits or damaging agricultural products (Koch, 2003; Koch et al., 2004; Koch & Galvan, 2008; Honěk, 2012; Lucas, 2012).

In America, the first translocation of *Harmonia axyridis* was to the USA in 1916, and recurrent introductions to USA and Canada occurred between 1964 and 1983 (Gordon, 1985; Hoebeke & Wheeler 1996). The first established feral populations in North America were recorded in 1988 in eastern USA (Chapin & Brou, 1991), in 1991 in western USA (LaMana & Miller, 1996), and in 1994 in Canada (Coderre et al., 1995). The two USA populations originated from independent introductions from the species' native range (Lombaert et al., 2010), and the Canadian population apparently spread from eastern USA (McCorquodale, 1998). All subsequent successful introductions of *H. axyridis* across America have seemingly sourced from eastern USA

(Lombaert et al., 2010). Mexican populations descend from eastern USA stocks deliberately released in northern Mexico (ca. 1997) and southeastern Mexico (1999–early 2000s) (Quiñones Pando & Tarango Rivero, 2005; Barrera & López-Arroyo, 2007). First translocations to Argentina (1986) and Chile (1998) used parental stocks from France but were unsuccessful in establishing populations (García, Becerra & Reising, 1999; Saini, 2004; Grez et al., 2010). Naturalised populations reported in Argentina in 2001, southern Brazil in 2002, and Chile in 2003 descend from at least two different eastern USA stocks (Almeida & Silva, 2002; Saini, 2004; Grez et al., 2010; Lombaert et al., 2010; Brown et al., 2011).

The oldest known naturalised populations of *H. axyridis* in South America were established in Colombia, where it was first collected in 1989 (Kondo & González, 2013). Since *H. axyridis* was extensively raised and shipped in the USA in the 1980s and 1990s (Teddars & Schaefer, 1994), and based on available dates, Colombian populations may also descend from eastern USA stock. It is probable that unrecorded international shipments were sent to Colombia, Argentina, and Chile—possibly to private farmers, thus the absence of public records. Subsequent South American records come from Ecuador (2004, see below), Paraguay (2006, Silvie et al., 2007), Uruguay (2007, Nedvěd & Krejčík, 2011; Serra et al. 2013), Peru (ca. 2010, Grez et al., 2010), and Venezuela (ca. 2014, Solano & Arcaya, 2014). It has not been formally reported from Guyana, Suriname and Bolivia (Camacho-Cervantes, Ortega-Iturriaga & del-Val, 2017; Hiller & Haelewaters, 2019), but a recent citizen-science record evidences that it is already present in Bolivia (Maslowski, 2020). Reports of *H. axyridis* from Central America have only recently been published, but the oldest records date back to 1988 and 1996—from Costa Rica. The species is currently established in most Central American countries, but is has not been reported from Belize, El Salvador and Nicaragua (Hiller & Haelewaters, 2019).

*Harmonia axyridis* was first recorded in Ecuador in 2012 by González & Kondo (2012) who reported 11 specimens collected in 2012 in deciduous forests on La Ceiba and Laipuna natural reserves (762 and 828 m elevation, respectively), province of Loja, extreme southwestern lowlands of Ecuador. Cornejo & González (2015) reported the species from mangroves on Santay island (at sea level), province of Guayas, southwestern Ecuador. González (2015) reported *H. axyridis* from the provinces of Azuay, Guayas and Loja, but without referencing any voucher

specimen from Azuay. Guamán Montaña (2017) presented photographs of *H. axyridis* from El Pangui (830 m elevation), province of Zamora-Chinchipe, providing the first reports on the south-eastern slopes of the Andes of Ecuador. Geographic and ecological data of *H. axyridis* in Ecuador are scarce. Herein, we discuss the distribution, natural history, and introduction history of *Harmonia* in Ecuador, evidencing that it has been present at least since 2004 and is currently widespread across the country.

## MATERIALS & METHODS

Coccinellid beetles were opportunistically collected since 2015 during field surveys of the Universidad San Francisco de Quito USFQ at 17 localities across northern Ecuador, (Figs. 1, 2). Field surveys were conducted by the authors, usually with 8-15 undergraduate students of the USFQ Biology program. All specimens were found by searching vegetation to look for adults and larvae. Collected specimens were euthanized by immersion in 70% ethanol or by placing in a killing jar and stored. An Olympus Research Stereomicroscope System SZX16 outfitted with an Olympus DP73 digital colour camera was used to observe specimens. Voucher specimens collected during our surveys are deposited at the Museo de Zoología (ZSFQ), Universidad San Francisco de Quito USFQ, Ecuador. Research permits were issued by Ministerio de Ambiente del Ecuador, 001-16IC-FLO-FAU-DNB/MA, 018-2017-IC-FAU-DNB/MAE, 019-2018-IC-FAU-DNB/MAE, and 006-2015-FAU-DPAP-MA.

We reviewed the entomological collections of Museo de Zoología, Pontificia Universidad Católica del Ecuador, Quito (QCAZ), and Instituto Nacional de Biodiversidad INABIO, Quito (MECN). Published information on *Harmonia axyridis* in Ecuador was synthesised based on a literature review using the library systems of King's College London and Universidad San Francisco de Quito USFQ, and Google Scholar™ scholarly text search (<https://scholar.google.com>). Relevant references were gathered using the search terms 'Coccinellidae', 'Harmonia', 'Harmonia axyridis', 'Mariquita', 'Ladybird', 'Ladybug', and 'Lady beetle', each one combined with 'Ecuador' by the Boolean operator 'AND'. Since *H. axyridis* has a diagnostic colouration pattern that allows its identification in photographs, we assembled data from photographic vouchers using the search engines of Flickr™ (<https://www.flickr.com>, by Yahoo!) and iNaturalist.org™ (<http://www.inaturalist.org>, by

California Academy of Sciences and the National Geographic Society) through GeoCat (Bachman et al., 2011; <http://geocat.kew.org/>) using the same search terms used for text searches. All searches were run on 10 February 2019 using on-site search engines and were not limited by study type, study design, or language. iNaturalist searches were rerun on 09 August 2019 and on 01 April 2020.

All localities, based on field surveys, literature, museum and photographic records, were georeferenced manually in Google Earth™ mapping service (7.3.1.5491 release by Google, Inc. on July 2018) based on direct information (coordinates and altitudinal data) when available, and additional data relevant to obtain an accurate and precise positioning, including catalogue and field notes, following recommendations by Wieczorek et al. (2004). All localities were reviewed and validated individually, and coordinates were amended when incorrectly georeferenced in the source. We determined the position most closely related with the locality description using toponymic information based on the Geographic Names Database, containing official standard names approved by the United States Board on Geographic Names and maintained by the National Geospatial-Intelligence Agency (<http://geonames.nga.mil/gns/html/>), OpenMapStreet data available under the Open Database Licence (<http://www.openstreetmap.org>), and gazetteers for Ecuador (Brown, 1941; Peters, 1955; Lynch & Duellman, 1997).

## RESULTS

In total, we collected information for 294 records of *Harmonia axyridis* from 53 localities in Ecuador (Figs. 1, 2), including: 106 specimens collected during field surveys and deposited at ZSFQ, 11 individuals recorded during field surveys but uncollected, 37 museum specimens (37 at QCAZ, none at MECN), 118 individuals recorded in iNaturalist, five photographic records from Flickr, and 17 literature records (González & Kondo, 2012; Cornejo & González, 2015; Guamán Montaña, 2017). Most records presented herein correspond to adult individuals, but larvae and pupa were recorded across the Andes. Specimens were identified as *Harmonia axyridis* by its characteristic morphology (Fig. 3), including: upper surfaces of elytra not hairy, distinct transverse fold at rear of elytra, underside of abdomen at least partially orange, brown to orange legs (Koch, 2003; Roy et al. 2016). One phenotypic form was found: f. *succinea*, with ground colour of pronotum white to light brown with M-shaped black marks, ground colour of elytra

bright orange, usually with nine black elytral spots (2-3-3-1) on each elytra, and a scutellary spot (Dobzhansky, 1933; Tan & Li, 1934; Koch, 2003; Brown et al., 2008; Roy et al., 2013; Roy et al., 2016).

The first specimens of *H. axyridis* in Ecuador were collected on both geographical extremes of the country: in 2004 at Mindo, northwestern Ecuador, and in 2007 at Loja, in southwestern Ecuador. Both localities are separated by about 450 km and nowadays have established populations. Our study reveals that *H. axyridis* is nowadays established in all main biogeographic regions of Ecuador, from sea level to at least 4020 m elevation, across 16 provinces (administrative geopolitical divisions of Ecuador) (Fig. 1). At least one record (at Estación Científica Yasuní) may correspond to a hitchhiking individual, since no established population in the Amazonian lowlands has been confirmed. The only regions where we did not find records are the southern Amazonian lowlands and the Galapagos Archipelago.

Almost two-thirds of the localities where we found records of *H. axyridis* are anthropogenic habitats (51% are urban green spaces in mid-size towns and large cities, and 20% are agricultural lands). Most of the records of *H. axyridis* in Ecuador come from the Andes, a region with significant agricultural and urban areas, including the capital city, Quito, and its metropolitan district. In urban green spaces, *H. axyridis* usually occupies gardens and parks dominated by non-native plants. *Harmonia axyridis* has been found also in 12 different ecosystems with native vegetation, usually collected along road borders and near human settlements.

During our surveys, *H. axyridis* was associated with the following plants (local names and families in parentheses): *Ambrosia arborescens* (Marco, Asteraceae), *Baccharis latifolia* (Chilca, Asteraceae), *Citrus × limon* (Limonero, Rutaceae), *Chusquea* sp. (Suro, Poaceae), *Cupressus* sp. (Ciprés, Cupressaceae), *Delostoma integrifolium* (Yalomán, Bignoniaceae), *Erigeron* sp. (Asteraceae), *Ficus benjamina* (Ficus, Moraceae), *Hibiscus rosa-sinensis* (Cucarda, Malvaceae), *Lantana camara* (Tupirrosa or Supirrosa, Verbenaceae), *Ligustrum* sp. (Oleaceae), *Lilium* sp. (Lirio amarillo, Liliaceae), *Ocimum basilicum* (Albahaca, Lamiaceae), *Petroselinum crispum* (Perejil, Apiaceae), *Prunus persica* (Durazno, Rosaceae), *Prunus serotina capuli* (Capulí, Rosaceae), *Rosa* sp. (Rosa, Rosaceae), *Senna multiglandulosa* (Chinchín, Fabaceae), *Solanum*



*nigrescens* (Yerbamora, Solanaceae), *Tecoma stans*, (Cholán, Bignoniaceae), *Trifolium repens* (Trébol blanco, Fabaceae), and *Verbesina sodiroi* (Asteraceae). The following coccinellids were found in sympatry with *H. axyridis* during our surveys at different localities: *Brachiacantha* sp. cf. *anita* (Mindó), *Cheilomenes sexmaculata* (Quito, Cumbayá, Tumbaco), *Cycloneda ecuadorica* (Guajalito, San Vicente), *C. emarginata* (Guajalito, Loja), *C. sanguinea* (Cumbayá, San Vicente), *Epilachna monovittata* (Guajalito), *E. flavofasciata* (Guajalito), *E. paenulata* (Quito, Mindó), *Hippodamia convergens* (Quito, Lumbisí, Cumbayá, Tumbaco, Yaruquí, Guajalito, San Vicente, Mindó, Loja), *Mulsantina mexicana* (Cumbayá, Yaruquí, Guajalito), *Neda norrisi* (San Antonio de Pichincha), and *Rodolia cardinalis* (San Antonio de Pichincha, Cumbayá). No parasitoids were detected.

Almost 30% of our field records of *H. axyridis* come from the Cumbayá-Tumbaco valley, an inter-Andean valley near Quito (Fig. 2), in northern Ecuador, where we had a higher sampling effort and were able to observe the coccinellid community in more detail. We found six coccinellid species in sympatry in gardens, parks and agricultural areas of the Cumbayá-Tumbaco valley: *Harmonia axyridis*, *Cheilomenes sexmaculata*, *Hippodamia convergens*, *Mulsantina mexicana*, *Rodolia cardinalis*, and *Cycloneda sanguinea*. *Harmonia axyridis* was the most common species in green urban areas, but is uncommon in agricultural areas, where *H. convergens* was dominant. *Rodolia cardilanis* and *C. sexmaculata* were found in syntopy with *H. axyridis*. By 2017, *H. convergens* was almost absent in most urban green areas of the Cumbayá-Tumbaco valley, remaining common only in agricultural areas. *Cheilomenes sexmaculata*, an apparently recent arrival—first recorded in the area on 2017, is nowadays becoming the second most common coccinellid in urban green areas of Quito-Cumbayá-Tumbaco, although still with a patchy distribution.

## DISCUSSION

Extensive and intensive entomological studies conducted in northern Ecuador up to 2001 did not record *Harmonia axyridis* (e.g., Cardona et al., 2005; Carvajal et al., 2005). Thus, the first naturalised populations of *H. axyridis* in Ecuador probably got established between 2001 and 2004, possibly as a result of intentional releases. Introduction of ladybirds has a long history in Ecuador; for example, in 1978, official national authorities released 24 million individuals of



*Hippodamia convergens* in the city of Quito and surroundings, in an attempt to control *Icerya purchasi* (Molineros Andrade, 1984). However, it is also possible that Ecuadorian populations spread from southern Colombia, since the oldest Colombian records occurred very close to the Ecuadorian border (Kondo & González, 2013). The presence of earliest Ecuadorian localities on opposite sides of the country (Mindo and Loja) and the absence of geographically intermediate records could suggest that Ecuadorian populations had two independent origins. However, museum records are biased due to limited collection efforts in the central provinces of Ecuador. Furthermore, spread rate of *H. axyridis* may be extremely fast and compensate for the distance between the localities (58–144.5 km/year in the UK Brown et al. 2007, 200 km/year in Slovakia, Roy et al. 2016; 185 km/year in Chile, Grez et al., 2016; 442 km/year in USA-Canada, McCorquodale, 1998; 500 km/year in South Africa, Stals, 2010). If southern Ecuadorian population would be demonstrated to have an independent origin, they may have given origin to the northern Peru populations—which remained unrecorded during extensive surveys in 2006 (Miró-Agurto & Castillo-Carrillo, 2010) and became established around 2010 (Grez et al., 2010).

The highest record of *H. axyridis* in Ecuador, at the locality of Mojanda, is also the highest record worldwide, 500 m higher than the upper elevational ranges reported by Grez et al. (2017) and González et al. (2018). Unfortunately, no ecological information was associated with that specimen. Lowland records mainly come from the Pacific lowlands and western Andean slopes, but also from the Amazonian foothills and lowlands. The Andean region was predicted as suitable for the expansion of *H. axyridis* by distribution models analysed by Koch et al. (2006) and Poutsma et al. (2007), which although predicted the expansion of *H. axyridis* across different habitats of America, their models did not show lowland forest. Interestingly, Ecuadorian records come from a variety of habitats, including forest and shrublands, evergreen and semideciduous vegetation, and across the urban-agricultural matrix. However, the most extensive and dense populations were found in urban areas.

It is likely that *H. axyridis* will keep spreading across most of Ecuador, especially in urban and agricultural environments, having effects on the diverse Ecuadorian fauna of coccinellids due to competition, exclusion, and intraguild predation. *Harmonia axyridis* may significantly impact predatory arthropod guilds, interfering with invertebrate population dynamics, potentially

producing impacts on native aphidophage groups and agricultural pests (Lucas et al. 2002, Koch 2003, Pervez & Omkar 2006, Koch & Galvan 2008, Ducatti et al. 2017). In particular, the arrival of *H. axyridis* to the Galapagos Archipelago could be problematic, due to the vulnerability of island ecosystems to impacts on endemic and native invertebrates and profound disruptions on trophic interactions (Causton et al. 2006).

*Harmonia axyridis* has attained the status of agricultural pest in North America because it feeds opportunistically on fruit when prey is scarce and acts as a wine contaminant (Koch et al. 2004, Koch & Galvan 2008). Grapes, apples, peaches, plums, pears, raspberries, among other fruits, have been reported to be consumed by *H. axyridis*, blemishing the fruits and reducing their value (Majerus, Strawson, Roy 2006, Koch & Galvan 2008, Guedes & Almeida 2013). All these fruits are produced in Ecuador, usually for local consumption but, in recent decades, have become important exportation products. Fruit crops occupy over 1600 km<sup>2</sup> in Ecuador (excluding bananas), are produced by more than 120000 farmers, and represent a small but growing sector in non-traditional agricultural exports in the country—contributing to ca. 4.4% of all non-traditional exportations (Viera et al. 2016, Verdugo-Morales & Andrade Díaz 2018, BCE 2020). Most Ecuadorian fruit crops are located across the highlands and western lowlands of the country (Niegel 1992, Huttel, Zebrowski, Gondard 1999), coinciding with areas where *H. axyridis* is expanding. Research on the impacts of *H. axyridis* in Ecuadorian fruit production Ecuador is urgently needed.

Wine contamination has been described as the most important agricultural impact of *H. axyridis*. Adults aggregate on injured grapes and can be disturbed or crushed during harvesting or pressing, releasing haemolymph that affects wine quality by causing unpleasant odour and taste—i.e., ladybug taint (Pickering et al. 2004, 2008, Koch & Galvan 2008). Despite table and wine grapes have been grown in Ecuador for local consumption since the 16th century (Popenoe 1924), commercial production has been fostered in recent decades (El Comercio 2017; Revista Líderes 2012, 2013; Viera et al. 2016). Vineyards in Ecuador have increased from 0.6 km<sup>2</sup> in 1985 to more than 2 km<sup>2</sup> nowadays—and expecting to reach 10 km<sup>2</sup> in the near future (Niegel 1992, El Comercio 2017; Revista Líderes 2012, 2013). Established populations of *H. axyridis* have been reported in all areas where Ecuadorian wineries have been developed (i.e., provinces of Guayas,

Pichincha, Azuay, and El Oro). Although Ecuadorian wine production is still modest, its presence in national and international markets is expanding (ProEcuador 2017) and ladybug taint could negatively impact this growing industry.

Information on the coccinellids of Ecuador is limited and fragmentary. It is important to increase research on the diversity, distribution, natural history, ecology and socio-economic effects of coccinellids in the country. Especially, information is needed across urban-agricultural-natural matrices, in order to evaluate the impacts of *H. axyridis* and other non-native species.

## Acknowledgements

We express our gratitude to Ana Nicole Acosta-Vásquez, Mateo Dávila-Játiva and Izan Chalen for their assistance, and to the students of the USFQ courses of Introduction to Biology and Zoology (years 2015, 2016, 2017, 2018, 2019) for their help in finding some of the populations of *Harmonia axyridis* herein reported. We thank the following people for provision of support and working space in their respective institutions or for the loan of specimens under their care: Santiago Villamarín (INABIO), Alvaro Barragán and Clifford Keil (QCAZ), and Giovanni Ramón (ZSFQ). We are grateful to Carlos Ruales for helping us to find some key literature about the first introductions of ladybirds in Ecuador and to all citizens scientist that continuously contribute to iNaturalist. We thank anonymous reviewers for their comments to previous versions of this paper, and Ministerio de Ambiente del Ecuador for issuing research permits.

## Funding statement:

This study was supported by Universidad San Francisco de Quito USFQ (Research Funds for project ID 35 “Biodiversity of urban and rural areas of Ecuador”, and ID 1057 "Impacts of habitat changes on the biological diversity of the northern tropical Andes" to DFCH) and operative funds assigned to Instituto de Diversidad Biológica Tropical iBIOTROP, Museo de Zoología & Laboratorio de Zoología Terrestre; and by Programa “Becas de Excelencia” of Secretaría de Educación Superior, Ciencia, Tecnología e Innovación SENESCYT, Ecuador.

## References

- Almeida LD, Silva VD. 2002. Primeiro registro de *Harmonia axyridis* (Pallas) (Coleoptera, Coccinellidae): um coccinelídeo originário da região Paleártica. *Revista Brasileira de Zoologia* 19(3): 941-944. DOI: <http://dx.doi.org/10.1590/S0101-81752002000300031>
- Bachman S, Moat J, Hill A, de la Torre J, Scott B. 2011. Supporting Red List threat assessments with GeoCAT: geospatial conservation assessment tool. *ZooKeys* 150: 117–126. DOI: <https://doi.org/10.3897/zookeys.150.2109> Available at <http://geocat.kew.org>
- Barrera JF, López-Arroyo JI. 2007. Control biológico de insectos plaga en el sureste de México; pp. 201–233, in: L.A. Rodríguez-del-Bosque and H.C. Arredondo- Bernal (eds.). *Teoría y Aplicación del Control Biológico*. México: Sociedad Mexicana de Control Biológico.
- BCE. 2020. Exportaciones no tradicionales. Información Estadística Mensual 2017 – Marzo 2020. Available at <https://contenido.bce.fin.ec/home1/estadisticas/bolmensual/IEMensual.jsp> (accessed 02 May 2020).
- Bellard C, Cassey P, & Blackburn TM. 2016. Alien species as a driver of recent extinctions. *Biology letters*, 12(2), 20150623. DOI: <https://doi.org/10.1098/rsbl.2015.0623>
- Berkvens N, Bonte J, Berkvens D, Deforce K, Tirry L, De Clercq P. 2008. Pollen as an alternative food for *Harmonia axyridis*. *BioControl* 53: 201–210. DOI: <https://doi.org/10.1007/s10526-007-9128-7>
- Boivin NL, Zeder MA, Fuller DQ, Crowther A, Larson G, Erlandson JM, Denham T, Petraglia MD. 2016. Ecological consequences of human niche construction: Examining long-term anthropogenic shaping of global species distributions. *Proceedings of the National Academy of Sciences*, 113(23):6388-6396. DOI: <http://doi.org/10.1073/pnas.1525200113>
- Brown FM. 1941. A Gazetteer of Entomological Stations in Ecuador. *Annals of the Entomological Society of America* 34(4): 809-851. DOI: <https://doi.org/10.1093/aesa/34.4.809>
- Brown MJP, Thomas CE, Lombaert E, Jeffries DL, Estoup A, Lawson Handley LJ. 2011. The global spread of *Harmonia axyridis* (Coleoptera: Coccinellidae): distribution, dispersal and routes of invasion. *BioControl* 56: 623-641. DOI: <http://dx.doi.org/10.1007/s10526-011-9379-1>
- Brown P, Roy H, Rothery P, Roy D, Ware R, Majerus M. 2007. *Harmonia axyridis* in Great Britain: analysis of the spread and distribution of a non-native coccinellid. *BioControl*. DOI: <http://dx.doi.org/10.1007/s10526-007-9124-y>

- 352 Brown PMJ, Adriaens T, Bathon H, Cuppen J, Goldarazena A, Hägg T, Kenis M, Klausnitzer  
353 BEM, Kovář I, Loomans AJM, Majerus MEN. 2008. *Harmonia axyridis* in Europe: spread  
354 and distribution of a non-native coccinellid. *BioControl*, 53(1), 5-21. DOI:  
355 <https://doi.org/10.1007/s10526-007-9132-y>
- 356 Camacho-Cervantes M, Ortega-Iturriaga A, del-Val E. 2017. From effective biocontrol agent to  
357 successful invader: the harlequin ladybird (*Harmonia axyridis*) as an example of good ideas  
358 that could go wrong. *PeerJ*, 5, e3296. DOI: <https://doi.org/10.7717/peerj.3296>
- 359 Cardona C, López-Avila A, Valarezo O. 2005. Chapter 4.2 Colombia and Ecuador; pp. 274–284,  
360 in: Anderson, P. K. & Morales, F. J. (eds.), *Whitefly and whitefly-borne viruses in the*  
361 *Tropics: Building a knowledge base for global action*. Cali: Centro Internacional de  
362 *Agricultura Tropical CIAT* (no. 341). Available at  
363 <https://books.google.com.ec/books?id=F0FgBQAAQBAJ>
- 364 Carvajal L. 2005. Lista preliminar de artrópodos del Bosque Protector Pichincha y sus  
365 alrededores. *Revista Politécnica* 26(1) *Biología* 6: 141–160. Available at:  
366 <http://bibdigital.epn.edu.ec/handle/15000/6356>
- 367 Causton CE, Peck SB, Sinclair BJ, Roque-Albelo L, Hodgson CJ, Landry B (2006). Alien  
368 Insects: Threats and Implications for Conservation of Galápagos Islands. *Annals of the*  
369 *Entomological Society of America*, 99(1), 121–143. DOI: [https://doi.org/10.1603/0013-](https://doi.org/10.1603/0013-8746(2006)099[0121:AITAIF]2.0.CO;2)  
370 [8746\(2006\)099\[0121:AITAIF\]2.0.CO;2](https://doi.org/10.1603/0013-8746(2006)099[0121:AITAIF]2.0.CO;2)
- 371 Chapin FS III, Zavaleta ES, Eviner VT, Naylor RL, Vitousek PM, Reynolds HL, Hooper DU,  
372 Lavorel S, Sala OE, Hobbie SE, Mack MC, Díaz S. 2000. Consequences of changing  
373 biodiversity. *Nature*, 405(6783): 234-242. DOI: <https://doi.org/10.1038/35012241>
- 374 Chapin JB, Brou VA. 1991. *Harmonia axyridis* (Pallas), the third species of the genus to be  
375 found in the United States (Coleoptera: Coccinellidae). *Proc Entomol Soc Wash* 93:630–635.
- 376 Cisneros-Heredia D.F. 2018. The Hitchhiker Wave: Non-native Small Terrestrial Vertebrates in  
377 the Galapagos. In: Torres M., Mena C. (eds) *Understanding Invasive Species in the Galapagos*  
378 *Islands. Social and Ecological Interactions in the Galapagos Islands*. Cham: Springer. DOI:  
379 [https://doi.org/10.1007/978-3-319-67177-2\\_7](https://doi.org/10.1007/978-3-319-67177-2_7)
- 380 Clavero M, García-Berthou E. 2005. Invasive species are a leading cause of animal extinctions.  
381 *Trends in Ecology and Evolution* 20(3): 110. DOI: <https://doi.org/10.1016/j.tree.2005.01.003>

- Coderre D, Lucas É, Gagné I. 1995. The occurrence of *Harmonia axyridis* (Pallas)(Coleoptera: Coccinellidae) in Canada. *The Canadian Entomologist*, 127(4): 609-611.
- Cornejo X, González G. 2015. Contribución al conocimiento de la fauna entomológica de los manglares: *Olla roatanensis* Vandenberg y *Cheilomenes sexmaculata* Fabricius, dos nuevos registros de Coleoptera: Coccinellidae para Ecuador y Perú. *Revista Científica de Ciencias Naturales y Ambientales* (Ecuador), 8(2): 76–80.
- Crooks JA. 2002. Characterizing ecosystem-level consequences of biological invasions: the role of ecosystem engineers. *Oikos*, 97(2): 153-166- DOI: <https://doi.org/10.1034/j.1600-0706.2002.970201.x>
- Daszak P, Cunningham AA, Hyatt AD. 2000. Emerging infectious diseases of wildlife--threats to biodiversity and human health. *Science* 287(5452): 443–449. DOI: <https://doi.org/10.1126/science.287.5452.443>
- Dobzhansky T. 1933. Geographical variation in lady-beetles. *The American Naturalist*, 67(709), 97-126.
- Doherty TS, Glen AS, Nimmo DG, Ritchie EG, Dickman CR. 2016. Invasive predators and global biodiversity loss. *Proceedings of the National Academy of Sciences* 113(40): 11261-11265. DOI: <https://doi.org/10.1073/pnas.1602480113>
- Doody JS, Green B, Rhind D, Castellano CM, Sims R, Robinson T. 2009. Population-level declines in Australian predators caused by an invasive species. *Animal Conservation* 12: 46-53. DOI: <https://doi.org/10.1111/j.1469-1795.2008.00219.x>
- Ducatti RDB, Ugine TA, Losey J. 2017. Interactions of the Asian lady beetle, *Harmonia axyridis* (Coleoptera: Coccinellidae), and the North American Native Lady Beetle, *Coccinella novemnotata* (Coleoptera: Coccinellidae): prospects for recovery post-decline. *Environmental Entomology* 46: 21–29.
- El Comercio. 2017. La siembra de uva crece en las tierras de Santa Elena; la producción el 2016 llegó a 3,93 millones de kilos. *El Comercio* 26/11/2017. Available at <https://www.elcomercio.com/actualidad/siembra-uva-santaelena-cultivo-produccion.html> (accessed 2 May 2020).
- García MF, Becerra VC, Reising CE. 1999. *Harmonia axyridis* Pallas (Col.: Coccinellidae). *Estudio biológico*. *Revista de la Facultad de Ciencias Agrarias* 31: 85–91.



- González G, Bustamante A, Grez AA. 2018. Touching the Sky: Coccinellids (Coleoptera: Coccinellidae) at High Altitudes in South America. Neotropical Entomology. DOI: <https://doi.org/10.1007/s13744-018-0644-1>
- González G, Kondo T. 2012. Primer registro de la especie invasora *Harmonia axyridis* (Pallas) (Coleoptera: Coccinellidae) en Ecuador. Boletín de la Sociedad Entomológica Aragonesa, 51, 310.
- González G. 2015. Los Coccinellidae de Ecuador Available at: <http://www.coccinellidae.cl/paginasWebEcu/Paginas/InicioEcu.php>
- Gordon RD. 1985. The Coccinellidae (Coleoptera) of America north of Mexico. Journal of New York Entomology Society 93(1): 1–912.
- Grez AA, Zaviezo T, González G, Rothmann S. 2010. *Harmonia axyridis* in Chile: a new threat. Ciencia e Investigación Agraria 37(3): 145–149. DOI: <http://dx.doi.org/10.4067/rcia.v37i3.157>
- Grez AA, Zaviezo T, Roy HE, Brown PM, Bizama G. 2016. Rapid spread of *Harmonia axyridis* in Chile and its effects on local coccinellid biodiversity. Diversity and Distributions, 22(9), 982–994. DOI: <https://doi.org/10.1111/ddi.12455>
- Grez AA., Zaviezo T, Roy HE, Brown PMJ, Segura B. 2017. In the shadow of the condor: invasive *Harmonia axyridis* found at very high altitude in the Chilean Andes. Insect Conservation and Diversity 10: 483–487. DOI: <http://doi.org/10.1111/icad.12258>
- Guamán Montaña DR. 2017. Inventario de las plagas y los insectos benéficos del cacao *Theobroma cacao* L. en el cantón El Pangui, provincia de Zamora Chinchipe (Bachelor's thesis, Loja: Universidad Nacional de Loja).
- Guedes CFDC, Almeida LMD. 2013. The potential of different fruit species as food for *Harmonia axyridis* (Pallas, 1773) (Coleoptera: Coccinellidae). Revista Brasileira de Fruticultura 35(4): 1025–1031. DOI: <https://doi.org/10.1590/S0100-29452013000400013>
- Hiller T, Haelewaters D. 2019. A case of silent invasion: Citizen science confirms the presence of *Harmonia axyridis* (Coleoptera, Coccinellidae) in Central America. PLoS ONE 14(7): e0220082. DOI: <https://doi.org/10.1371/journal.pone.0220082>
- Hoebeke ER, Wheeler Jr AG. 1996. Adventive lady beetles (Coleoptera: Coccinellidae) in the Canadian Maritime Provinces, with new eastern US records of *Harmonia quadripunctata*. Entomological News 107(5): 281–290.



- 443 Honěk A. 2012. Distribution and habitats; pp. 110–140, in: I. Hodex, H.F. van Emden and A.  
444 Honěk (eds.). Ecology and behaviour of the ladybird beetles (Coccinellidae). Chichester:  
445 Blackwell Publishing. DOI: <http://dx.doi.org/10.1002/9781118223208.ch4>
- 446 Huttel C, Zebrowski C, Gondard P. 1999. Paisajes Agrarios del Ecuador. Geografía Básica del  
447 Ecuador, Tomo V Geografía Agraria, Vol. 2. Quito: IRD, IPGH, IFEA, IGM, PUCE. 285 pp.
- 448 Katsanis A, Babendreier D, Nentwig W, Kenis M. 2013. Intraguild predation between the  
449 invasive ladybird *Harmonia axyridis* and non-target European coccinellid species. BioControl  
450 58: 73. DOI: <https://doi.org/10.1007/s10526-012-9470-2>
- 451 Koch RL. 2003. The multicolored Asian lady beetle, *Harmonia axyridis*: A review of its biology,  
452 uses in biological control, and non-target impacts. Journal of Insect Science 3: 1–16. DOI:  
453 <http://dx.doi.org/10.1093/jis/3.1.32>
- 454 Koch RL, Galvan TL. 2008. Bad side of a good beetle: the North American experience with  
455 *Harmonia axyridis*. Biocontrol 53: 23–35. DOI: <http://dx.doi.org/10.1007/s10526-007-9121-1>
- 456 Koch RL, Venette RC, Hutchison WD. 2006. Invasions by *Harmonia axyridis* (Pallas)  
457 (Coleoptera: Coccinellidae) in the Western Hemisphere: implications for South America,  
458 Neotropical Entomology 35: 421–434. DOI: <http://doi.org/10.1590/S1519-566X2006000400001>
- 459
- 460 Koch RL, Burkness EC, Wold Burkness SJ, Hutchinson WD. 2004. Phytophagous preferences of  
461 the multicolored Asian lady beetle (Coleoptera: Coccinellidae) for autumn-ripening fruit.  
462 Journal of Economic Entomology 97(2): 539–544. DOI: <http://dx.doi.org/10.1603/0022-0493-97.2.539>
- 463
- 464 Kondo T, González G. 2013. The multicolored Asian lady beetle, *Harmonia axyridis* (Pallas,  
465 1773) (Coleoptera: Coccinellidae), a not so new invasive insect in Colombia and South  
466 America. Insecta Mundi, 0283, 1-7.
- 467 LaMana ML, Miller JC. 1996. Field observations on *Harmonia axyridis* Pallas (Coleoptera:  
468 Coccinellidae) in Oregon. *Biological Control*, 6: 232-237
- 469 Lombaert E, Guillemaud T, Cornuet JM, Malausa T, Facon B, Estoup A. 2010. Bridgehead effect  
470 in the worldwide invasion of the biocontrol Harlequin Ladybird. PLoS ONE 5(3): e9743. DOI:  
471 <http://dx.doi.org/10.1371/journal.pone.0009743>

- Lucas E. 2012. Intraguild interactions; pp. 343–374, in: I. Hodex, H.F. van Emden and A. Honěk (eds.). Ecology and behaviour of the ladybird beetles (Coccinellidae). Chichester: Blackwell Publishing. DOI: <http://dx.doi.org/10.1002/9781118223208.ch7>
- Lucas E, Gagné I, Coderre D. 2002. Impact of the arrival of *Harmonia axyridis* on adults of *Coccinella septempunctata* and *Coleomegilla maculata* (Coleoptera: Coccinellidae). *European Journal of Entomology*, 99, 457–463.
- Lynch JD, Duellman WE. 1997. Frogs of the genus *Eleutherodactylus* (Leptodactylidae) in western Ecuador: systematic, ecology, and biogeography. University of Kansas: Natural History Museum.
- Mace GM, Masundire H, Baillie J, Ricketts T, Brooks T, Hoffmann M, Stuart S, Balmford A, Purvis A, Reyers B, Wang J, Revenga C, Kennedy E, Naeem S, Alkemade R, Allnutt T, Bakarr M, Bond W, Chanson J, Cox N, Fonseca G, Hilton-Taylor C, Loucks C, Rodrigues A, Sechrest W, Stattersfield A, Janse van Rensburg B, Whiteman C, Abell R, Cokeliss Z, Lamoreux J, Pereira HM, Thönnell J, Williams P. 2005. Biodiversity. In Rashid M. Hassan et al. (eds.) Ecosystems and human well-being: current state and trends: findings of the Condition and Trends Working Group of the Millennium Ecosystem Assessment. The millennium ecosystem assessment series. Washington, DC: Island Press. p. 77–122.
- Majerus M, Strawson V, Roy H. 2006. The potential impacts of the arrival of the harlequin ladybird, *Harmonia axyridis* (Pallas) (Coleoptera: Coccinellidae), in Britain. *Ecological Entomology* 31: 207–215.
- Martins C., Almeida LM, Zonta-de-Carvalho RC, Castro CF & Pereira RA. 2009. *Harmonia axyridis*: a threat to Brazilian Coccinellidae? *Revista Brasileira de Entomologia* 53(4): 663–671. DOI: <http://dx.doi.org/10.1590/S0085-56262009000400018>
- Maslowski J. 2020. *Harmonia axyridis*. iNaturalist. <https://www.inaturalist.org/observations/43139216>. Access date: 02/05/2020
- McCorquodale DB. 1998. Adventive lady beetles (Coleoptera: Coccinellidae) in eastern Nova Scotia, Canada. *Entomological News*, 109(1), 15-20.
- Michaud JP. 2012. Coccinellids in biological control; pp. 488–519, in: I. Hodex, H.F. van Emden and A. Honěk (eds.). Ecology and behaviour of the ladybird beetles (Coccinellidae). Chichester: Blackwell Publishing. DOI: <http://dx.doi.org/10.1002/9781118223208.ch11>

- Miró-Agurto JJ, Castillo-Carrillo PS. 2010. Especies de “mariquitas” (Coleoptera: Coccinellidae) en los frutales de Tumbes. *Revista Peruana de Entomología*. 46(1): 21 - 29.
- Molineros Andrade J. 1984. Control de la Escama Algodonosa *Icerya purchasi* Maskell en Quito y sus alrededores 1977–1979. Memorias del Encuentro Entomológico Ecuatoriano. Publicaciones del Museo Ecuatoriano de Ciencias Naturales, Serie Miscelánea 3. Quito: Museo Ecuatoriano de Ciencias Naturales.
- Moser SE, Harwood JD, Obrycki JJ. 2008. Larval feeding on Bt-hybrid and non-Bt corn seedlings by *Harmonia axyridis* (Coleoptera, Coccinellidae) and *Coleomegilla maculata* (Coleoptera, Coccinellidae). *Environmental Entomology* 37(2): 525–533. DOI: <https://doi.org/10.1093/ee/37.2.525>
- Nedvěd O, Krejčík S. 2010. Record of the ladybird *Harmonia axyridis* (Coleoptera: Coccinellidae) from Uruguay. *Klapalekiana* 46:203-204.
- Niegel W. 1992. La fruticultura de hoja caduca en Ecuador. *Acta Horticulturae* 310: 23–33.
- O’Dowd DJ, Green PT, Lake PS. 2003. Invasional ‘meltdown’ on an oceanic island. *Ecology Letters*, 6:812-817. DOI: <https://doi.org/10.1046/j.1461-0248.2003.00512.x>
- Orlova-Bienkowskaja MJ, Ukrainsky A, Brown PMJ. 2015. *Harmonia axyridis* (Coleoptera: Coccinellidae) in Asia: a re-examination of the native range and invasion to southeastern Kazakhstan and Kyrgyzstan. *Biological Invasions* 17: 1941–1948. DOI: <http://dx.doi.org/10.1007/s10530-015-0848-9>
- Pejchar L, Mooney HA. 2009. Invasive species, ecosystem services and human well-being. *Trends in ecology and evolution*, 24(9): 497-504. DOI: <https://doi.org/10.1016/j.tree.2009.03.016>
- Pell JK, Baverstock J, Roy HE, Ware RL, Majerus MEN. 2008. Intraguild predation involving *Harmonia axyridis*: a review of current knowledge and future perspectives. *BioControl* 53: 147. DOI: <https://doi.org/10.1007/s10526-007-9125-x>
- Pervez A, Omkar. 2006. Ecology and biological control application of multicoloured Asian ladybird, *Harmonia axyridis*: a review. *Biocontrol Science and Technology* 16(2), 111–128.
- Peters JA. 1955. Herpetological type localities in Ecuador. *Revista Ecuatoriana de Entomología y Parasitología*, 2(3-4): 335-352.

- Pickering GJ, Lin J, Riesen R, Reynolds A, Brindle I & Soleas G. 2004. Influence of *Harmonia axyridis* on the sensory properties of white and red wine. American Journal of Enology and Viticulture 55: 153–159. DOI: <https://doi.org/10.5073/vitis.2008.47.227-230>
- Pickering GJ, Spink M, Kotseridis Y, Brindle ID, Sears M, Inglis D. 2008. The influence of *Harmonia axyridis* morbidity on 2-Isopropyl-3-methoxypyrazine in 'Cabernet Sauvignon' wine. Vitis 47(4): 227–230.
- Popenoe W. 1924. Economic fruit-bearing plants of Ecuador. Contributions from the United States National Herbarium 24: 101–134.
- Poutsma J, Loomans AJM, Aukema B, Heijerman T. (2007). Predicting the potential geographical distribution of the harlequin ladybird, *Harmonia axyridis*, using the CLIMEX model. BioControl 53: 103–125. DOI: <https://doi.org/10.1007/s10526-007-9140-y>
- ProEcuador. 2017. Vinos y licores ecuatorianos conquistan paladares en el mundo. Available at <https://www.proecuador.gob.ec/vinos-y-licores-ecuatorianos-conquistan-paladares-en-el-mundo/> (accessed May 27, 2020).
- Quiñonez Pando FJ, Tarango Rivero SH. 2005. Desarrollo y supervivencia de *Harmonia axyridis* Pallas (Coleoptera: Coccinellidae) en función de la especie presa. Agricultura Técnica en México 31(1): 3–9.
- Revista Líderes. 2012. De playas para finos paladares de vino. Revista Líderes 18/12/2012. Available at <https://www.revistalideres.ec/lideres/playas-finos-paladares-vino.html> (accessed 2 May 2020).
- Revista Líderes. 2013. El vino de Yaruquí cosecha paladares en el país. Revista Líderes 18/11/2013. Available at <https://www.revistalideres.ec/lideres/vino-yaruqui-cosecha-paladares-pais.html> (accessed 2 May 2020).
- Ricciardi A. 2007. Are Modern Biological Invasions an Unprecedented Form of Global Change? Conservation Biology, 21(2): 329-336. DOI: <https://doi.org/10.1111/j.1523-1739.2006.00615.x>
- Ricciardi A, Hoopes MF, Marchetti MP, Lockwood JL. 2013. Progress toward understanding the ecological impacts of nonnative species. Ecological Monographs 83(3):263-282. DOI: <https://doi.org/10.1890/13-0183.1>
- Roy H, Brown P, Majerus M. 2006. *Harmonia axyridis*: A successful biocontrol agent or an invasive threat?; pp. 295–309, in: J. Eilenberg and H.M.T. Hokkanen (eds.). An ecological and

societal approach to biological control. Amsterdam: Springer. DOI:

[http://dx.doi.org/10.1007/978-1-4020-4401-4\\_15](http://dx.doi.org/10.1007/978-1-4020-4401-4_15)

Roy H, Wajnberg E. 2008. From biological control to invasion: the ladybird *Harmonia axyris*

as a model species. *BioControl*, 53:1-4. DOI: <https://doi.org/10.1007/s10526-007-9127-8>

Roy HE, Brown, PMJ, Comont RF, Poland RL, Sloggett, JJ. 2013. Ladybirds. 2<sup>nd</sup> Edition.

Naturalist's Handbooks 10. Exeter: Pelagic Publishing.

Roy, HE, Brown PM, Adriaens T, Berkvens N, Borges I, Clusella-Trullas S, Comont RF, De

Clercq P, Eschen R, Estoup A, Evans EW. 2016. The harlequin ladybird, *Harmonia axyridis*:

global perspectives on invasion history and ecology. *Biological Invasions*, 18(4), 997-1044.

DOI: <https://doi.org/10.1007/s10530-016-1077-6>

Saini ED. 2004. Presencia de *Harmonia axyridis* (Pallas) (Coleoptera: Coccinellidae) en la

provincia de Buenos Aires: aspectos biológicos y morfológicos, RIA 33: 151–160.

Serra WS, González G, Greco-Spíngola S. 2013. Lista sistemática y distribución geográfica de

las especies de Coccinellidae (Insecta: Coleoptera) presentes en Uruguay. *Boletín de la*

Sociedad Entomológica Aragonesa (S.E.A.) 53: 229–242.

Silvie P, Aberlenc HP, Duverger C, Bérenger JM, Cardozo R, Gómez V. 2007. *Harmonia*

*axyridis* no Paraguai e novos predadores identificados no cultivo do algodoeiro. In : X

Simposio de Controle Biológico, 30 June - 4 July 2007, Brasília, Brasil, s.n., 1 p.

<http://agritrop.cirad.fr/542623/>

Simberloff D, Martin JL, Genovesi P, Maris V, Wardle DA, Aronson J, Courchamp F, Galil B,

García-Berthou E, Pascal M, Pyšek P, Sousa R, Tabacchi E, Vilà M. 2013. Impacts of

biological invasions: what's what and the way forward. *Trends in Ecology and Evolution*,

28(1):58-66. DOI: <http://doi.org/10.1016/j.tree.2012.07.013>

Solano Y, Arcaya E. 2014. Primer registro de *Harmonia axyridis* (Pallas, 1773) (Coleoptera:

Coccinellidae) en Venezuela. *Entomotropica* 29(1): 57–61.

Stals R. 2010. The establishment and rapid spread of an alien invasive lady beetle: *Harmonia*

*axyridis* (Coleoptera: Coccinellidae) in southern Africa, 2001–2009. *IOBC/wprs Bulletin*, 58,

125–132.

Tan CC, Li JC. 1934. Inheritance of the elytral color patterns of the lady-bird beetle, *Harmonia*

*axyridis* Pallas. *The American Naturalist*, 68(716), 252-265.

- 592 Tedders WL, Schaefer PW. 1994. Release and establishment of *Harmonia axyridis* (Coleoptera:  
593 Coccinellidae) in the southeastern United States. Entomological News, 105(4), 228-243.
- 594 Verdugo-Morales N, Andrade-Díaz V. 2018. Productos tradicionales y no tradicionales del  
595 Ecuador: Posicionamiento y eficiencia en el mercado internacional para el período 2013 –  
596 2017. X-Pedientes Económicos 2(3): 84–102.
- 597 Viera W, Moreira R, Vargas Y, Martínez A, Álvarez H, Castro J, Zambrano J. 2016. Current  
598 status of fruit production in Ecuador. International Journal of Clinical and Biological Science  
599 1(Suppl. 1): S1.
- 600 Vilcinskas A, Mukherjee K, Vogel H. 2013. Expansion of the antimicrobial peptide repertoire in  
601 the invasive ladybird *Harmonia axyridis*. Proceedings of the Royal Society B 280(1750):  
602 20122113. <http://dx.doi.org/10.1098/rspb.2012.2113>
- 603 Ware RL, Majerus MEN. 2008. Intraguild predation of immature stages of British and Japanese  
604 coccinellids by the invasive ladybird *Harmonia axyridis*. BioControl 53:169. DOI:  
605 <https://doi.org/10.1007/s10526-007-9135-8>
- 606 Wieczorek J, Guo Q, Hijmans RJ. 2004. The point-radius method for georeferencing locality  
607 descriptions and calculating associated uncertainty. International Journal of Geographical  
608 Information Science, 18(8): 745-767. DOI: <https://doi.org/10.1080/13658810412331280211>

Figure 1. Map of Ecuador showing known localities of the Harlequin Ladybird *Harmonia axyridis* (Pallas, 1773) by year. Left: Map showing records between 2004–2015. Right: Records between 2016–2020. Each locality point may correspond to several records.

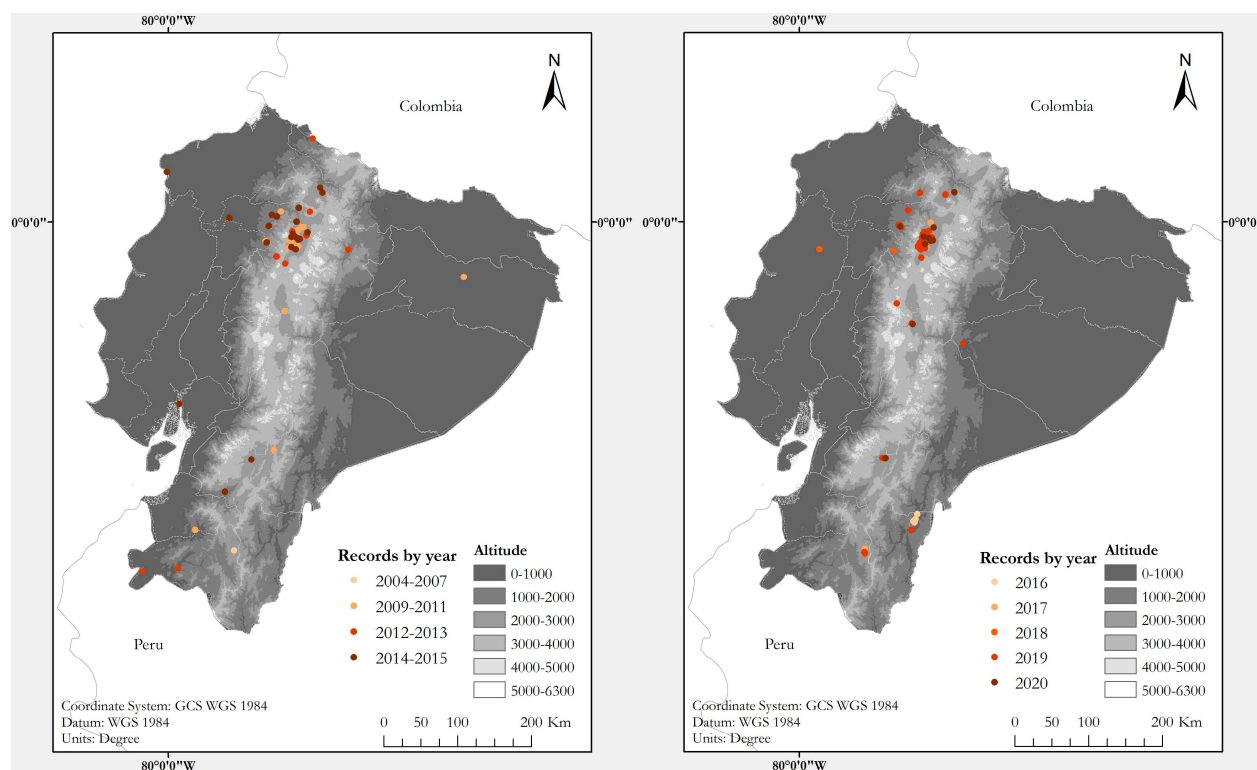



614 Figure 2. Map showing known localities of the Harlequin Ladybird in the valley of Quito, capital  
615 city of Ecuador, by year. Dashed area marks the city of Quito. Each locality point may  
616 correspond to several records.

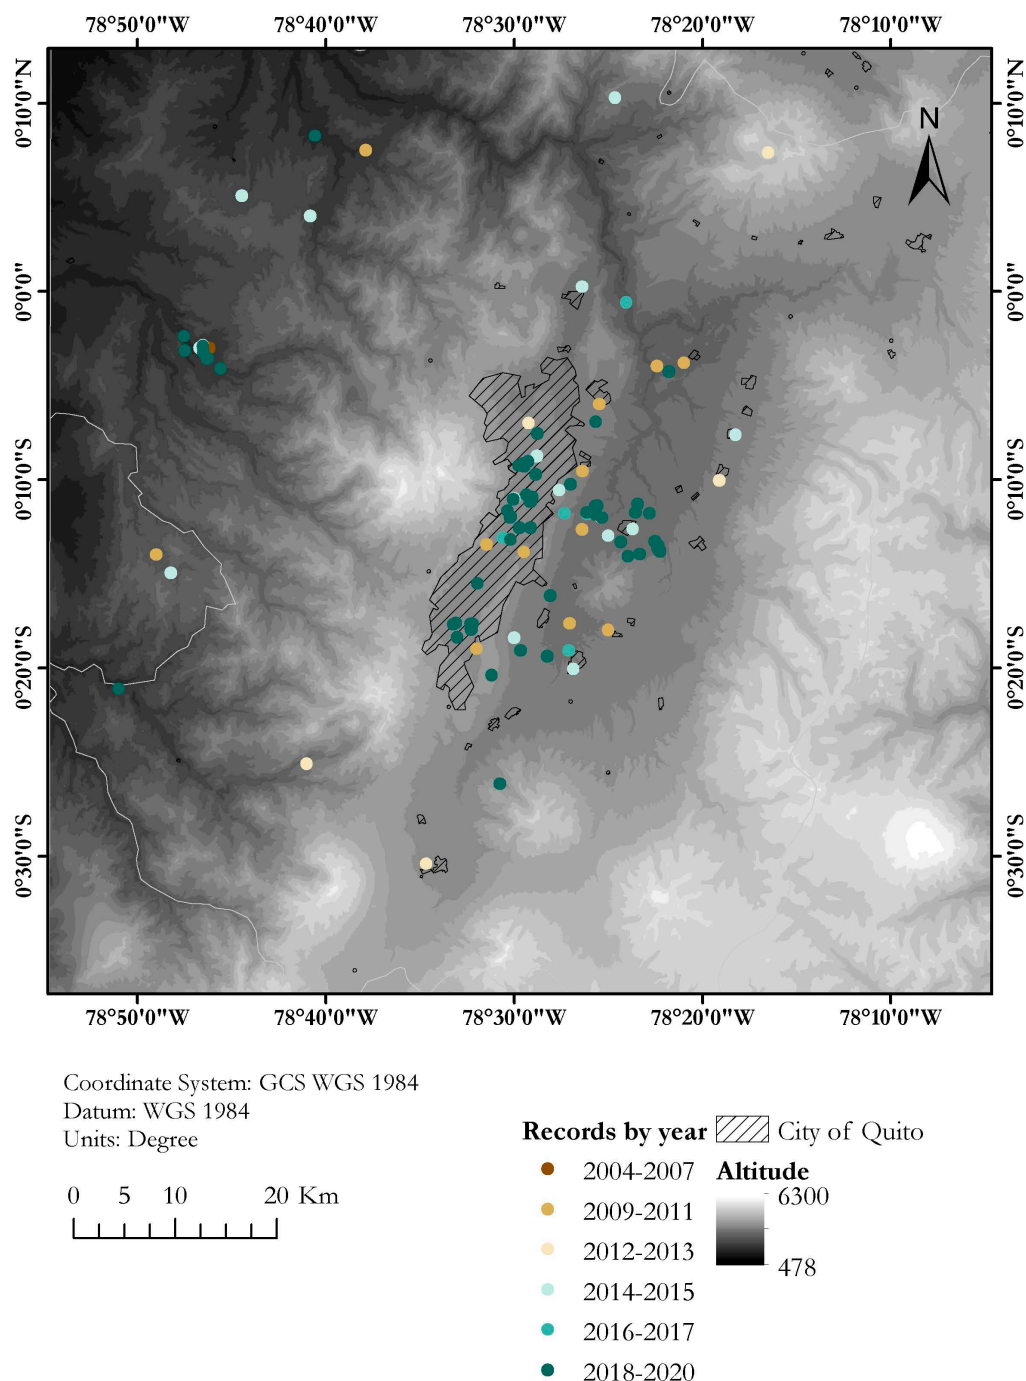

Figure 3. *Harmonia axyridis* from Ecuador. Photo of specimen ZSFQ-I058 collected in Cumbayá (USFQ campus), province of Pichincha, Ecuador, showing the typical habitus of Ecuadorian populations.

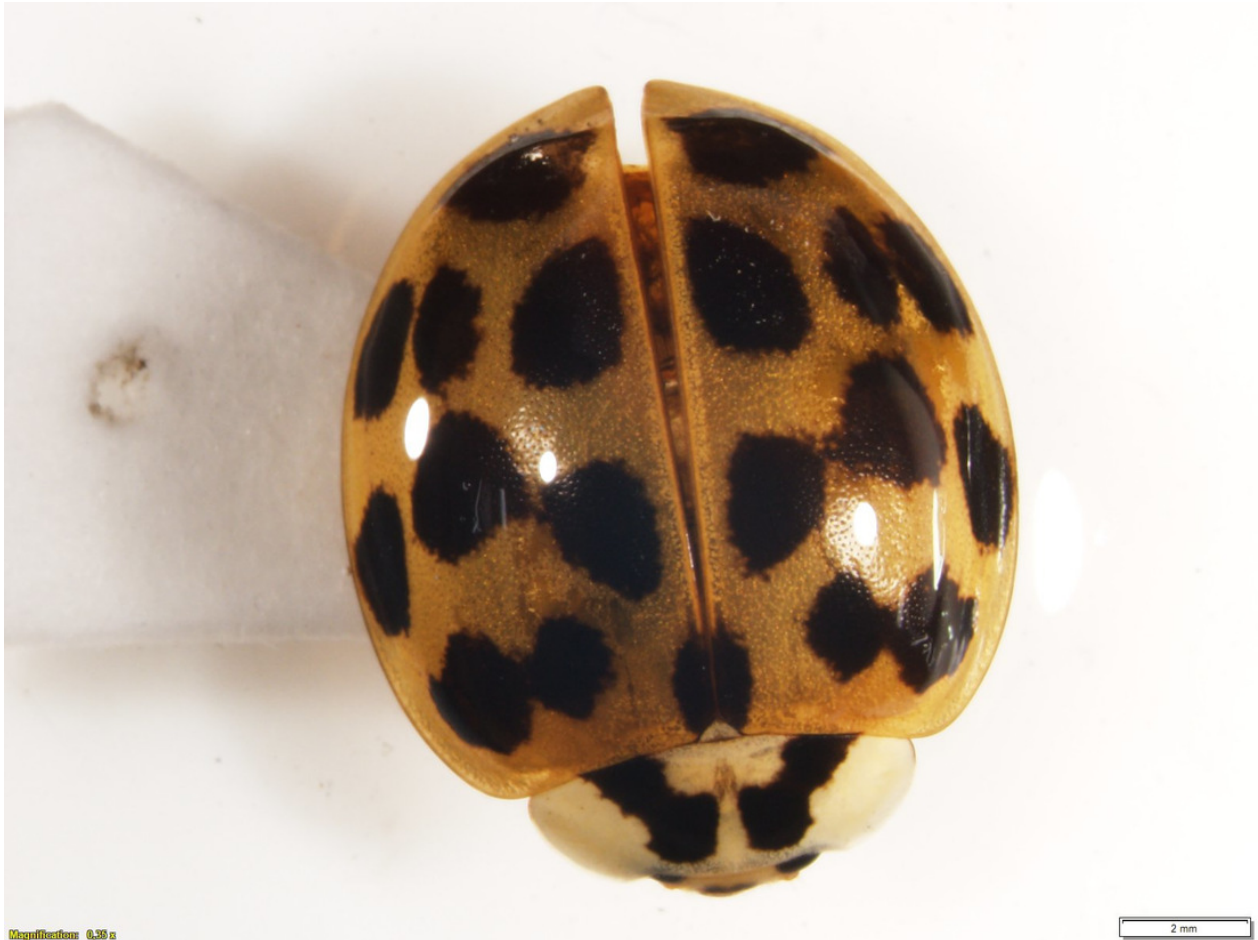

Source: https://www.biorxiv.org/content/10.1101/2020.06.08.140392v1.full.pdf
